# Supplementary material
Source: PubMed Central journal article supplement (PMC6657286)
Supplement: awy305_supplementary_data.pdf [file awy305_supplementary_data.pdf]

## MMP13 inhibition rescues cognitive decline in Alzheimer transgenic mice via BACE1 regulation

Bing-Lin Zhu<sup>1,#</sup>, Yan Long<sup>1,#</sup>, Wei Luo<sup>2</sup>, Zhen Yan<sup>3</sup>, Yu-Jie Lai<sup>1</sup>, Li-Ge Zhao<sup>1</sup>, Wei-Hui Zhou<sup>4</sup>, Yan-Jiang Wang<sup>5</sup>, Lin-Lin Shen<sup>5</sup>, Lu Liu<sup>1</sup>, Xiao-Juan Deng<sup>1</sup>, Xue-Feng Wang<sup>1</sup>, Fei Sun<sup>6</sup>, Guo-Jun Chen<sup>1,\*</sup>

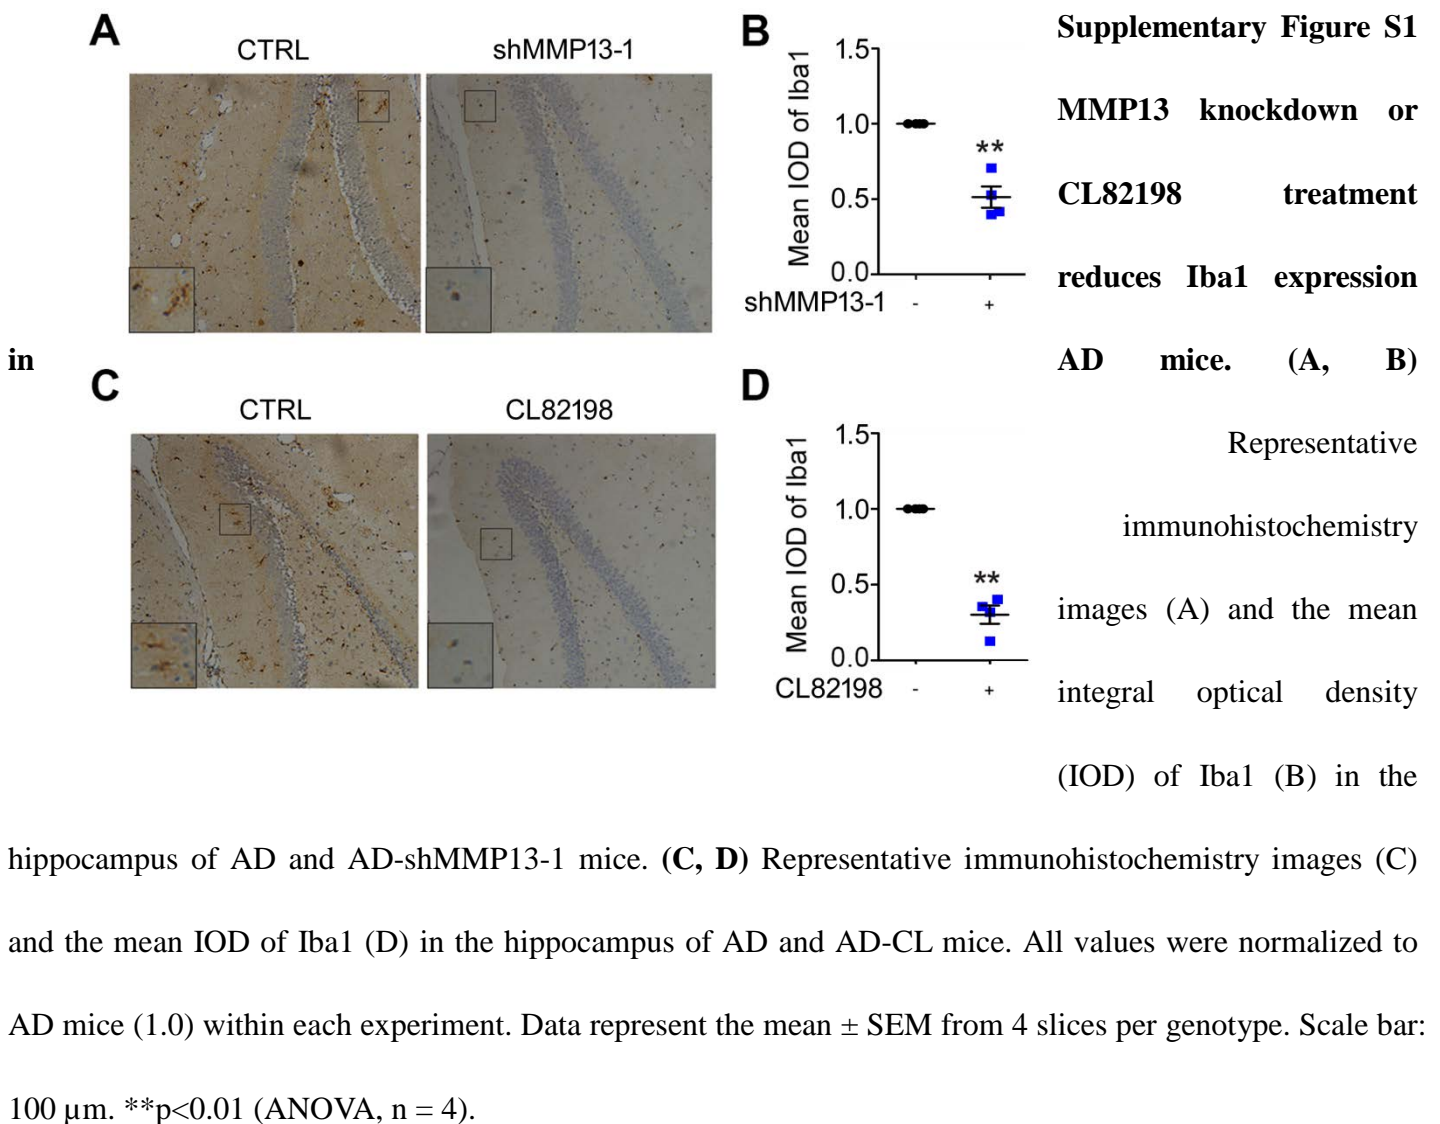

**Supplementary table 1** The clinical features of AD patients and control subjects from Sydney Brain Bank

| <b>Case #</b> | <b>Age</b> | <b>Gender</b> | <b>Postmortem delay<br/>(hour)</b> | <b>Cause of death</b>     | <b>Disease duration<br/>(year)</b> | <b>Case characterisation</b>  |
|---------------|------------|---------------|------------------------------------|---------------------------|------------------------------------|-------------------------------|
| 345           | 85         | Female        | 23                                 | Pneumonia                 | 0                                  | no significant neuropathology |
| 603           | 101        | Female        | 9                                  | Cardiorespiratory failure | 0                                  | no significant neuropathology |
| 759           | 93         | Female        | 15                                 | Gastrointestinal bleeding | 0                                  | no significant neuropathology |
|               |            |               |                                    |                           |                                    |                               |
| 492           | 100        | Female        | 3                                  | Aspiration pneumonia      | 11                                 | Alzheimer's disease           |
| 516           | 80         | Female        | 32                                 | Cardiorespiratory failure | 10                                 | Alzheimer's disease           |
| 678           | 91         | Female        | 6                                  | Cardiorespiratory failure | 7                                  | Alzheimer's disease           |

**Supplementary table 2** The clinical features of AD patients and control subjects from NIH NeuroBiobank

| <b>HBS number</b> | <b>Sample number</b> | <b>sex</b> | <b>Age (years)</b> | <b>Postmortem interval (hours)</b> | <b>Clinical diagnosis</b>                  | <b>Neuropathological diagnosis</b>                                                                  |
|-------------------|----------------------|------------|--------------------|------------------------------------|--------------------------------------------|-----------------------------------------------------------------------------------------------------|
| 4431              | 1                    | female     | 68                 | 23.7                               | myocardial infarction                      | essential normal brain                                                                              |
| 3861              | 2                    | female     | 81                 | 14.5                               | COPD/pneumonia                             | essential unremarkable brain                                                                        |
| 3795              | 3                    | female     | 72                 | 14                                 | CA, ovarian/CA, peritoneal                 | essential normal brain                                                                              |
| 3740              | 4                    | female     | 88                 | 14                                 | leukemia                                   | essential normal brain                                                                              |
| 3777              | 5                    | male       | 84                 | 13.5                               | myoplastic syndrome/pancytopenia           | essential normal brain                                                                              |
| 5072              | 6                    | male       | 83                 | 19.5                               | COPD/seizure disorders/atrial fibrillation | no significant abnormalities                                                                        |
| 5265              | 7                    | male       | 80                 | 18.75                              | normal                                     | granulovascular degeneration and lipofuscin accumulation in hippocampal neurons consistent with age |
| 4320              | 8                    | male       | 87                 | 9.3                                | congestive heart failure                   | normal aging                                                                                        |
| 4691              | 9                    | male       | 74                 | 23.6                               | alcohol abuse                              | essential normal brain                                                                              |
| 3805              | 10                   | male       | 70                 | 12                                 | renal failure, acute/diabetes melitus      | essential normal brain                                                                              |
|                   |                      |            |                    |                                    |                                            |                                                                                                     |
| 3278              | 1                    | female     | 81                 | 11.3                               | Alzheimer's Disease                        | definite(cerad)                                                                                     |
| 3311              | 2                    | female     | 77                 | 23                                 | Alzheimer's Disease                        | braak 5                                                                                             |

|      |    |        |    |       |                     |                         |
|------|----|--------|----|-------|---------------------|-------------------------|
| 3342 | 3  | female | 88 | 12.4  | Alzheimer's Disease | definite(cerad)         |
| 3478 | 4  | male   | 88 | 15.5  | Alzheimer's Disease | definite(cerad)/braak5  |
| 3512 | 5  | male   | 76 | 13.8  | Alzheimer's Disease | definite(cerad)/braak 6 |
| 3530 | 6  | male   | 84 | 14.8  | Alzheimer's Disease | definite(cerad)/braak5  |
| 3674 | 7  | male   | 79 | 7.5   | Alzheimer's Disease | definite(cerad)         |
| 3316 | 8  | female | 77 | 13    | Alzheimer's Disease | braak 5                 |
| 3329 | 9  | female | 74 | 14    | Alzheimer's Disease | definite(cerad)/braak 6 |
| 3367 | 10 | female | 75 | 19.75 | Alzheimer's Disease | definite(cerad)/braak5  |



**Fig. 1C full blots**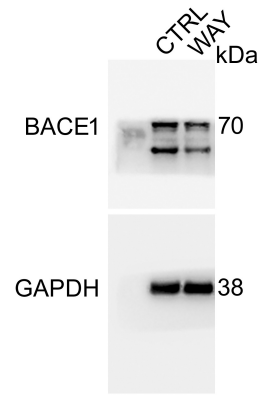**Fig. 1D full blots**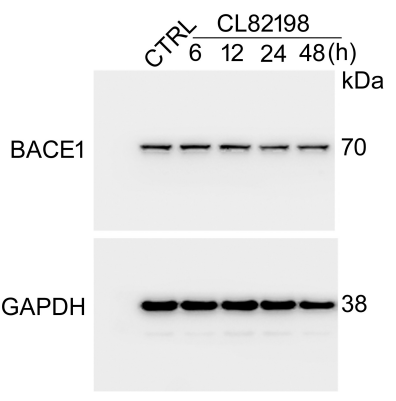**Fig. 1E full blots**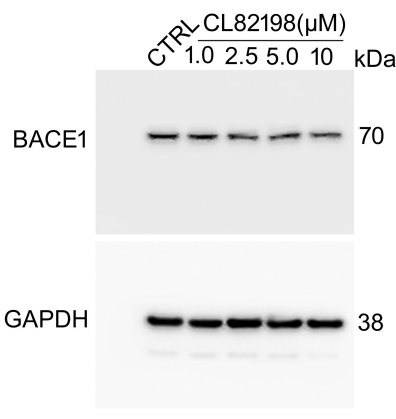**Fig. 1F full blots**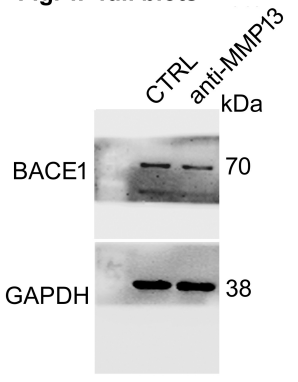**Fig. 1G full blots**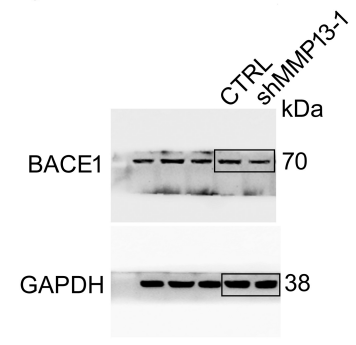**Fig. 1H full blots**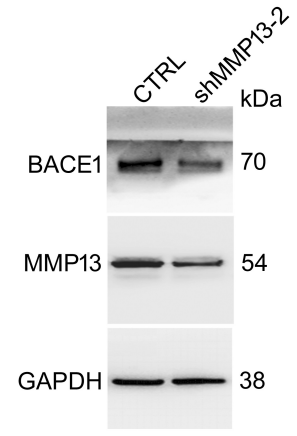**Fig. 1I full blots**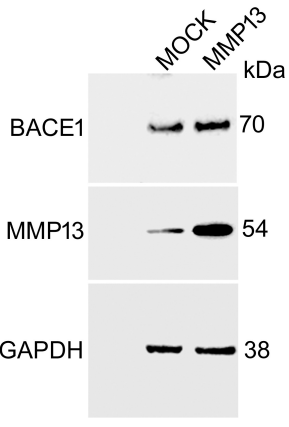**Fig. 1J full blots**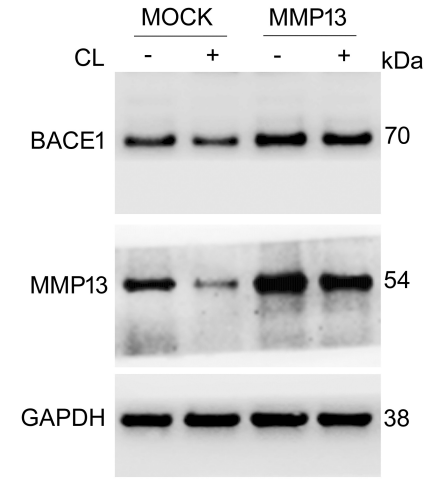**Fig. 1K full blots**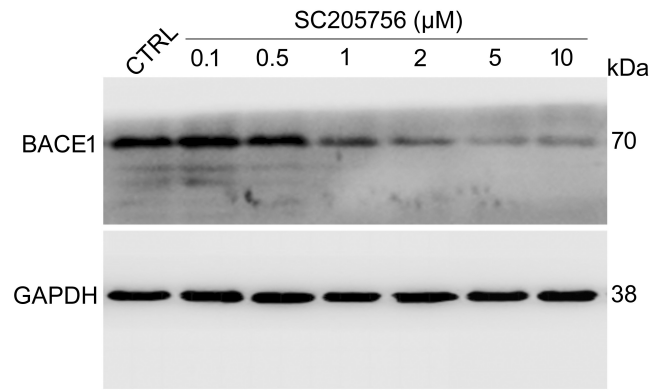**Fig. 1L full blots**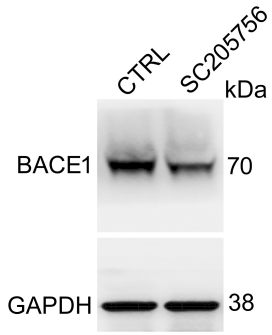**Fig. 1M full blots**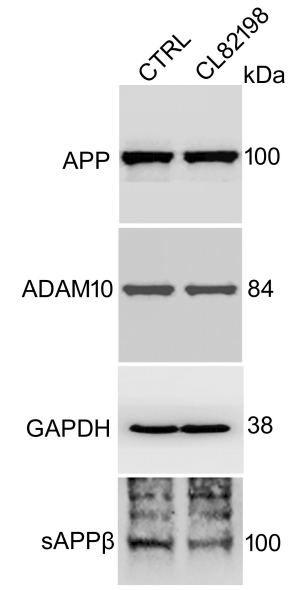**Full blots for Figure 1**

**Fig. 2A full blots**

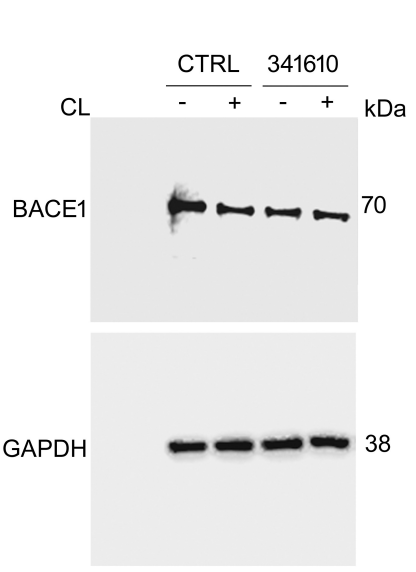

**Fig. 2B full blots**

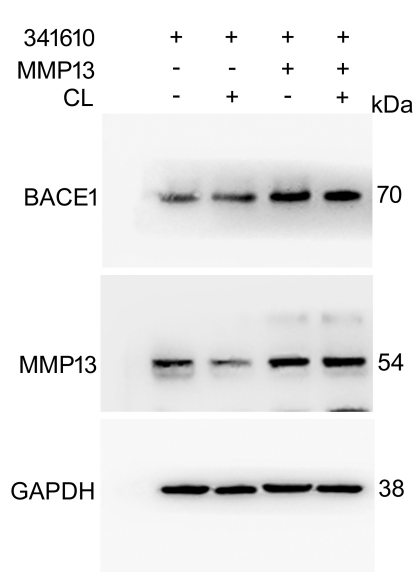

**Fig. 2D full blots**

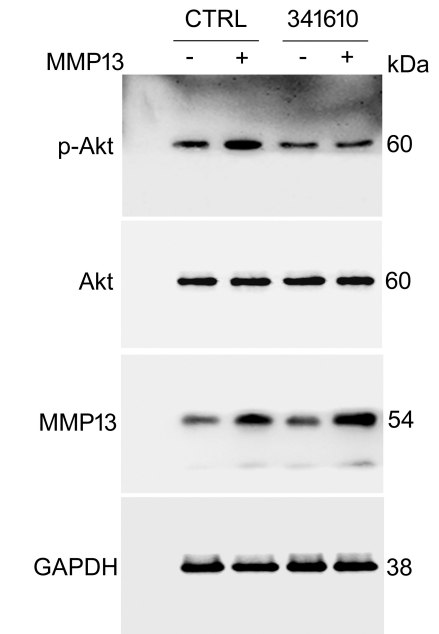

**Fig. 2E full blots**

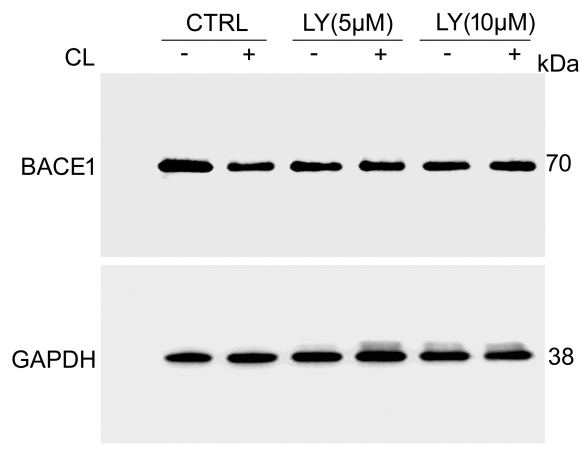

**Fig. 2F full blots**

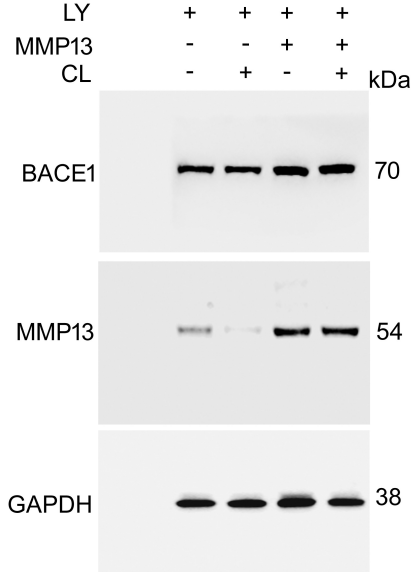

**Fig. 2I full blots**

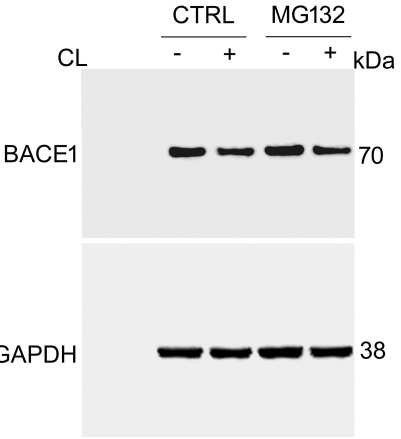

**Fig. 2J full blots**

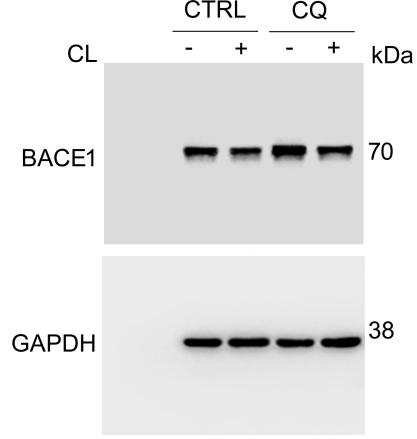

**Fig. 2K full blots**

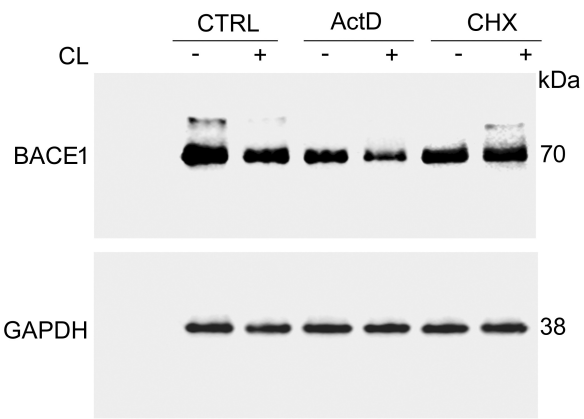

**Fig. 3A full blots**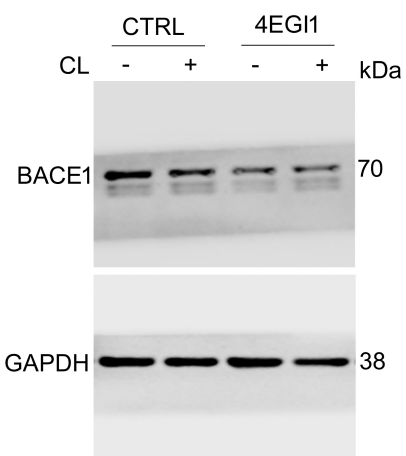**Fig. 3B full blots**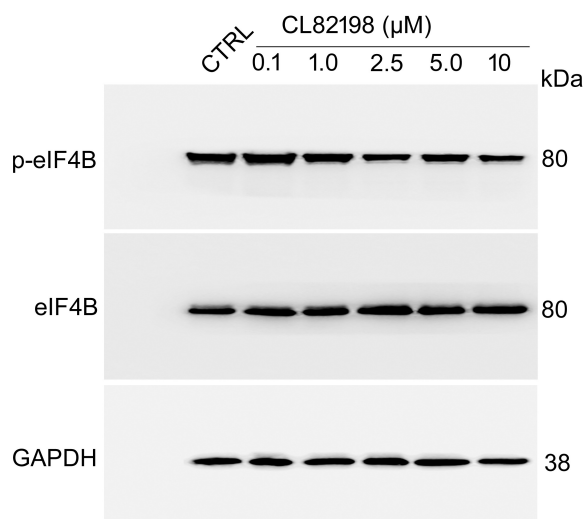**Fig. 3C full blots**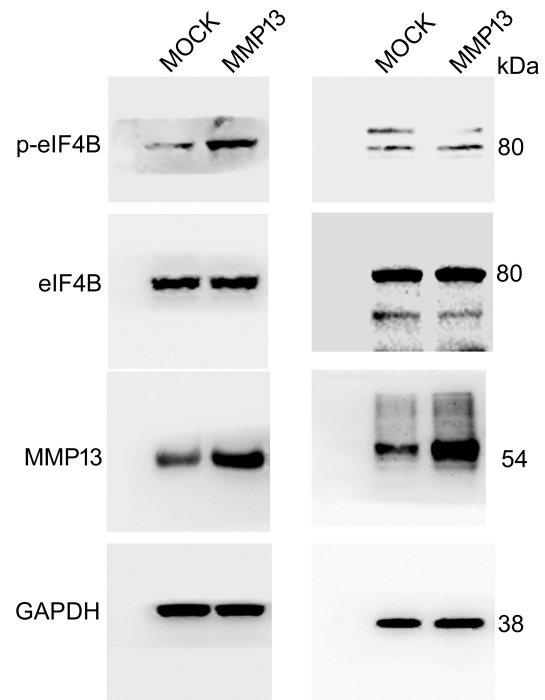**Fig. 3D full blots**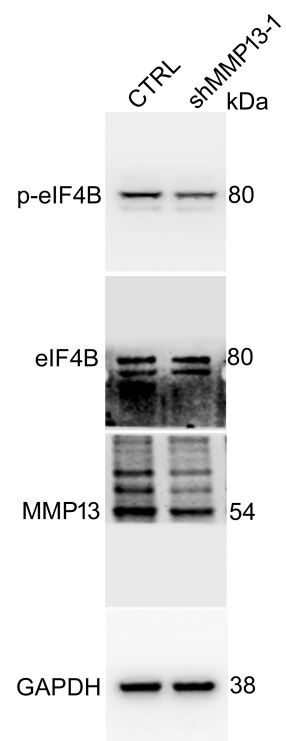**Fig. 3E full blots**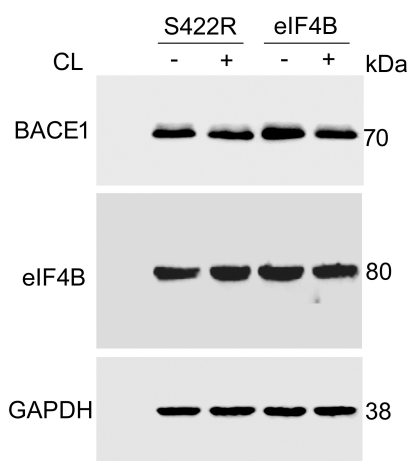**Fig. 3G full blots**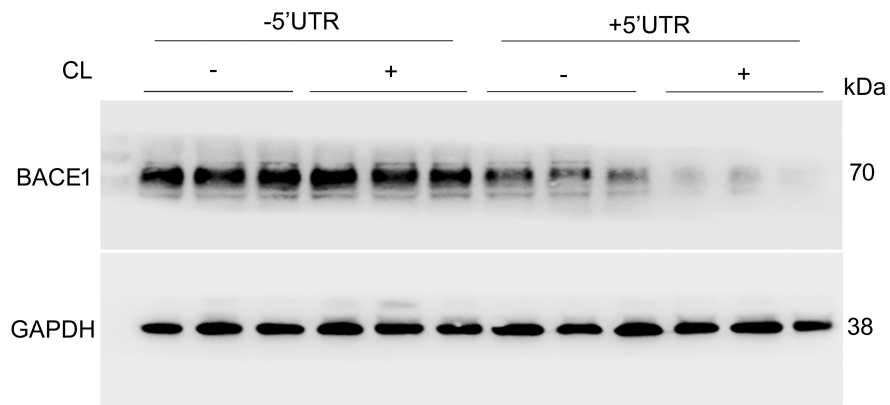**Fig. 3F full blots**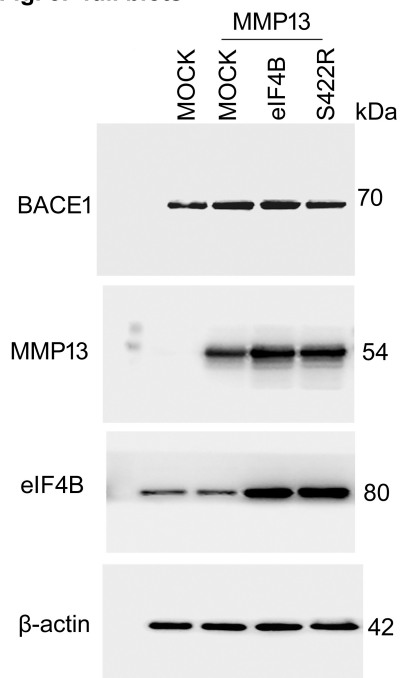**Fig. 3H full blots**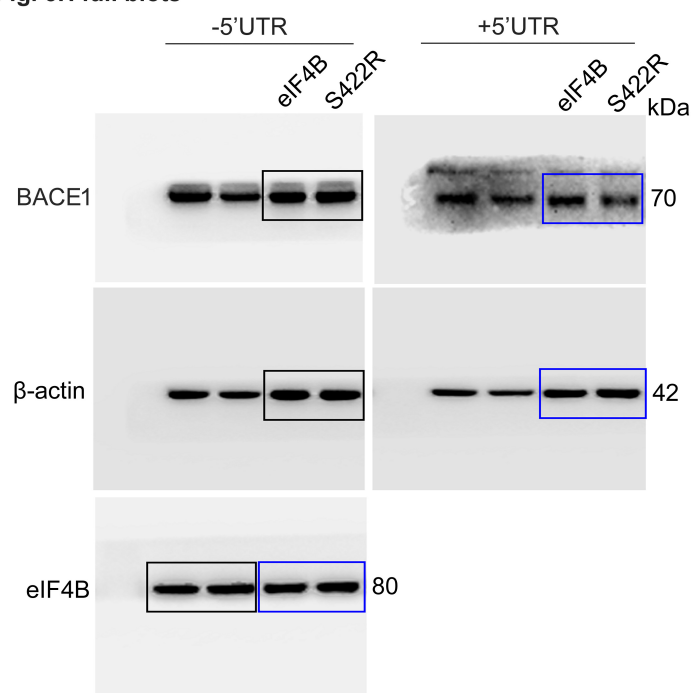

**Fig. 4A (a) full blots**

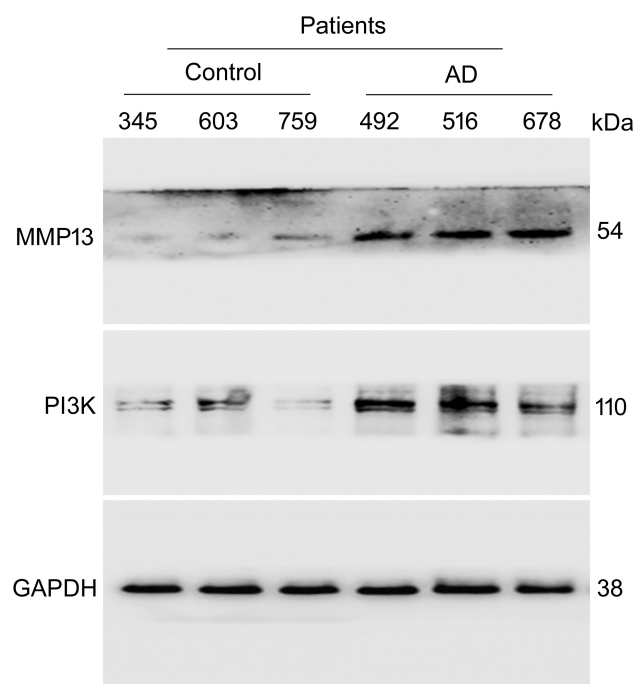

**Fig. 4A(c) full blots**

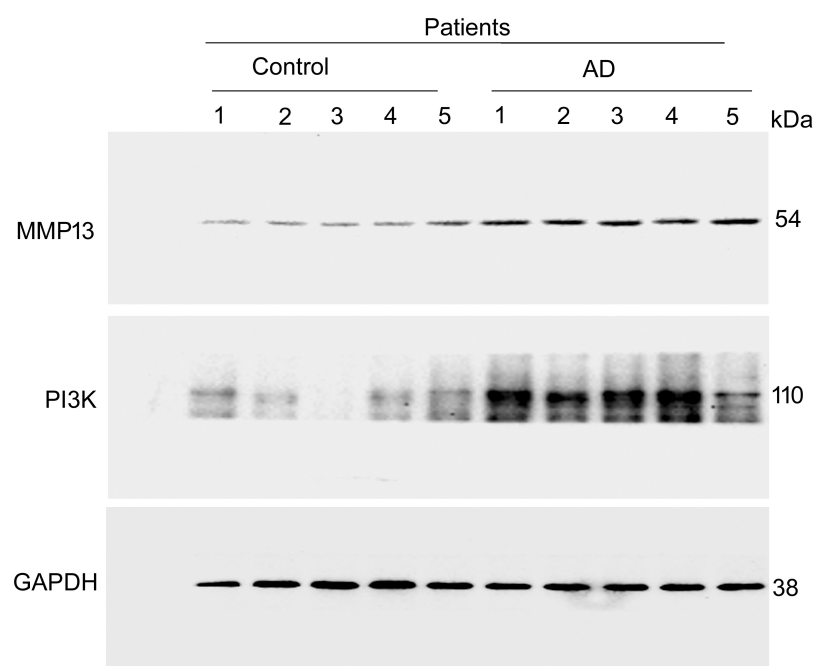

**Fig. 4A(d) full blots**

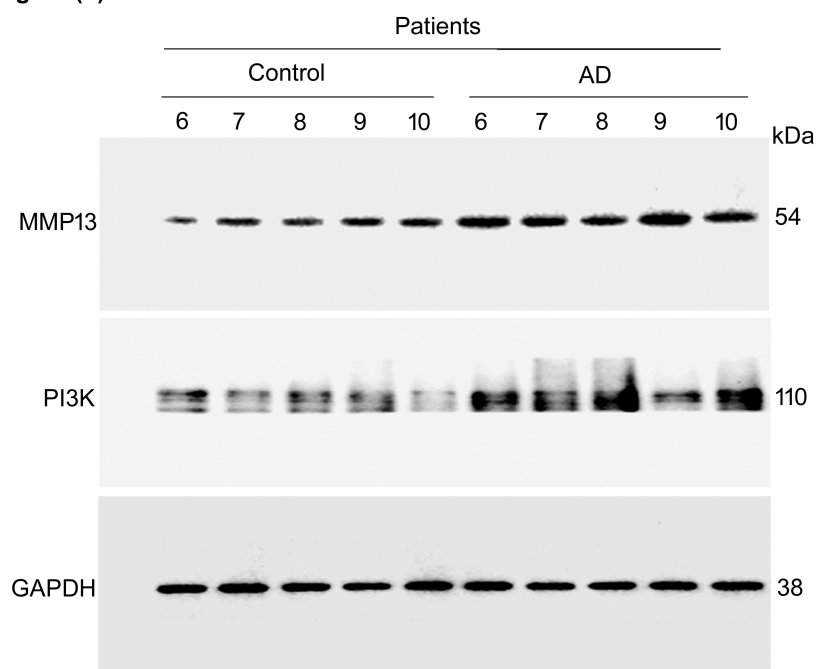

**Fig. 4C full blots**

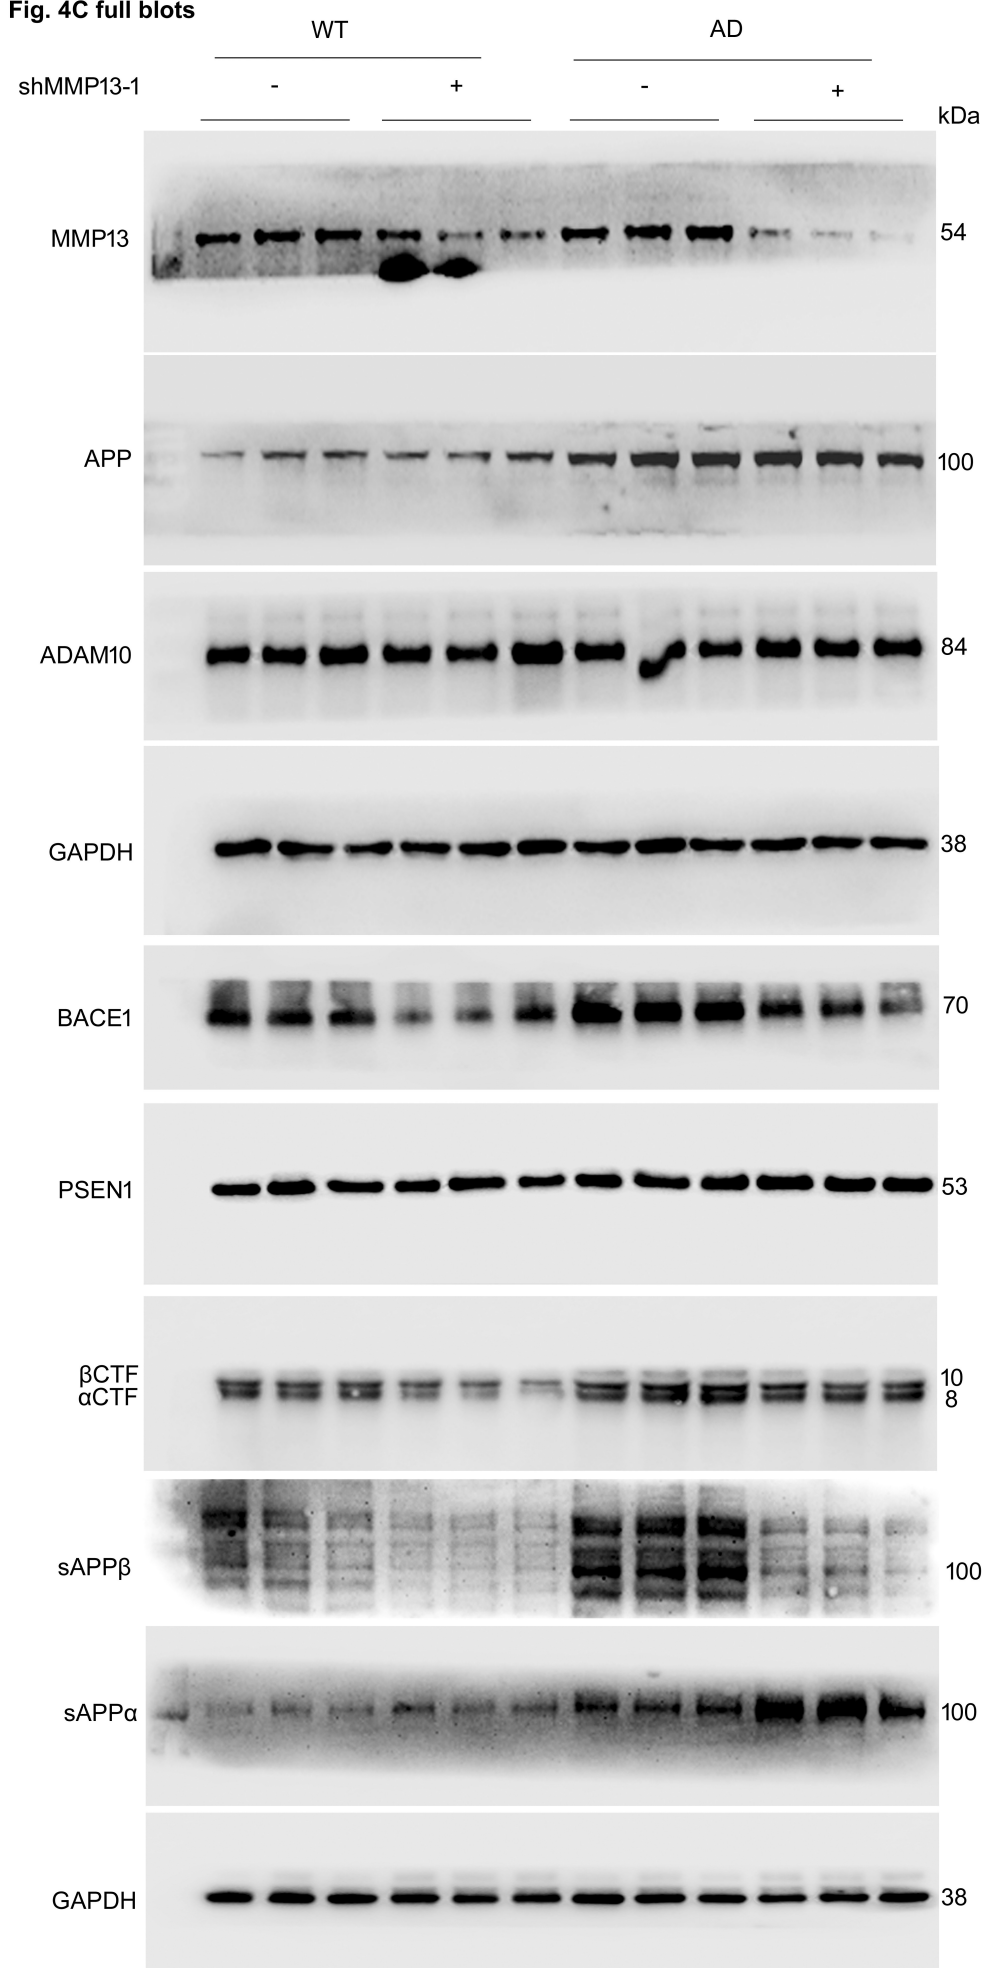

**Fig. 4D full blots**

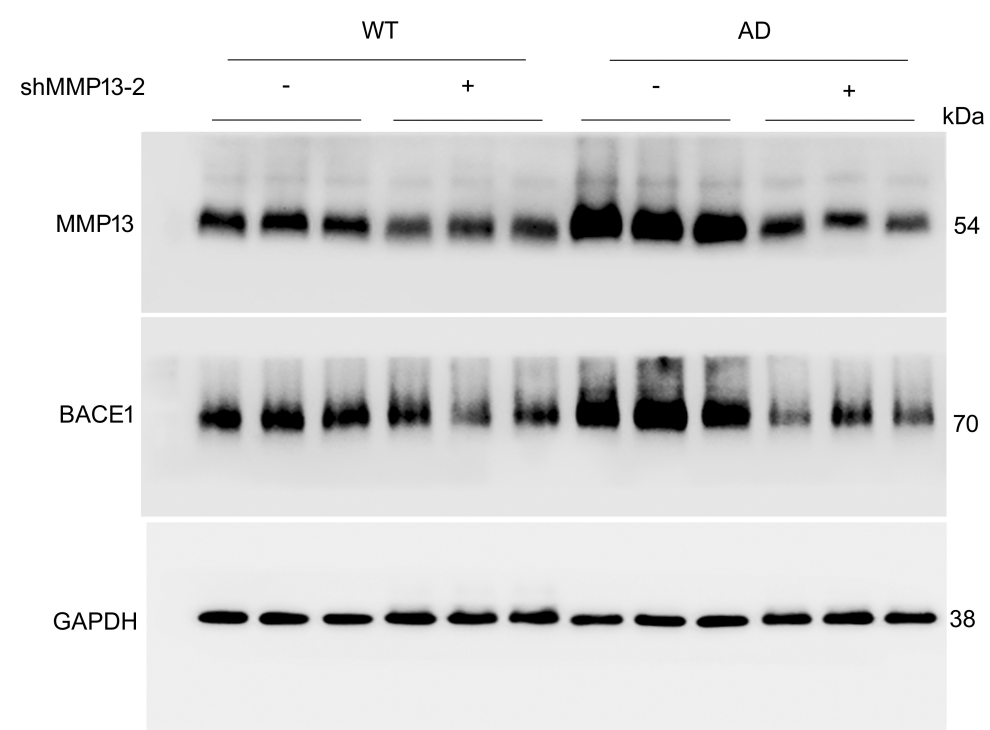

**Fig. 4F full blots**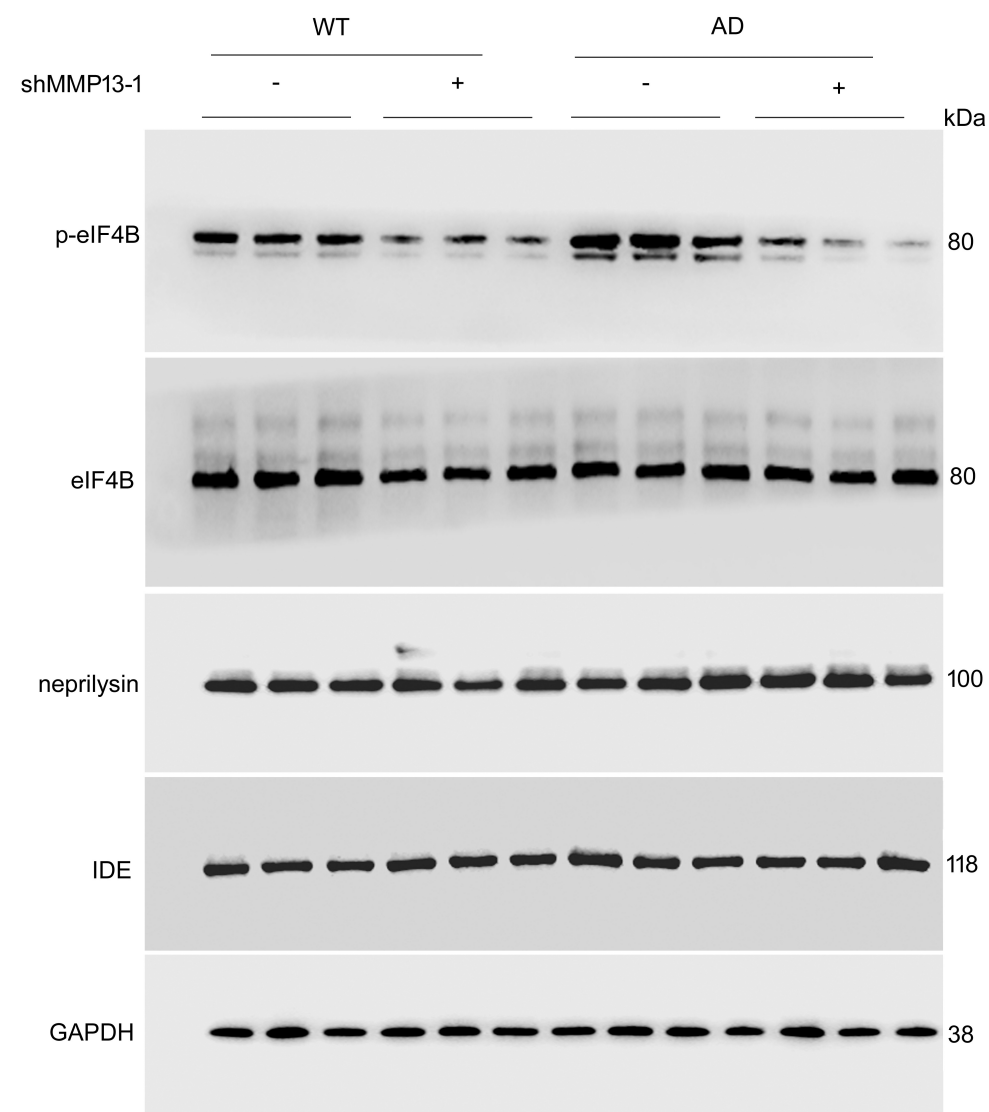**Fig. 5B full blots**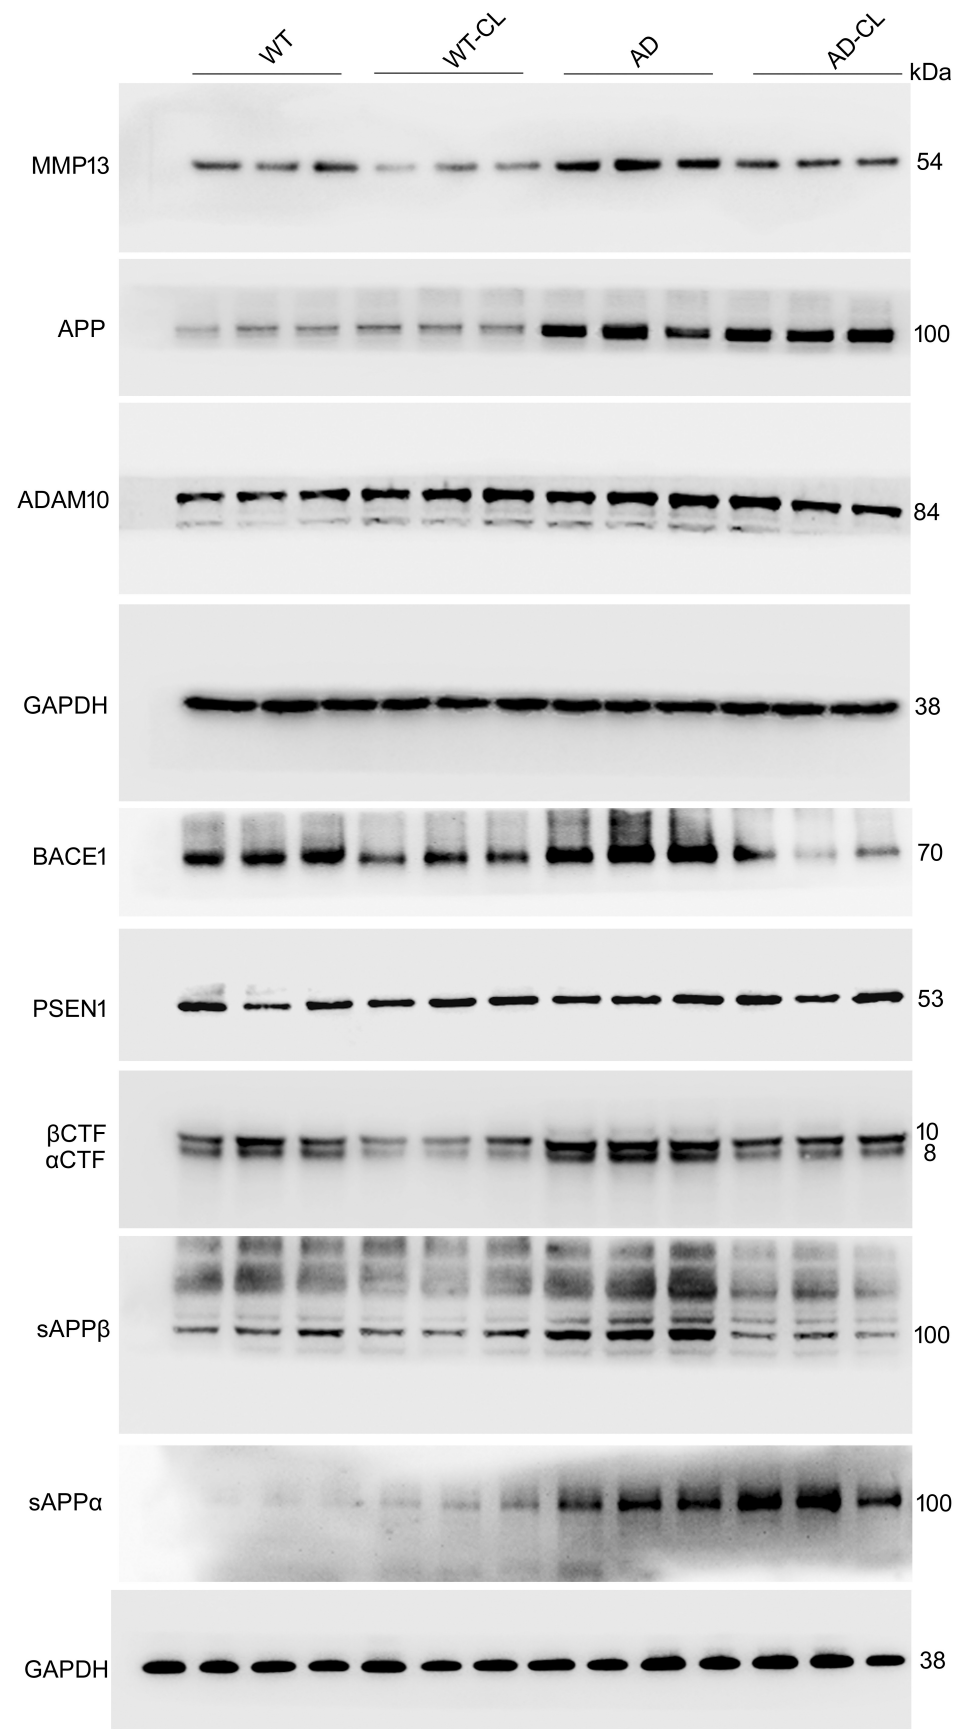**Fig. 5D full blots**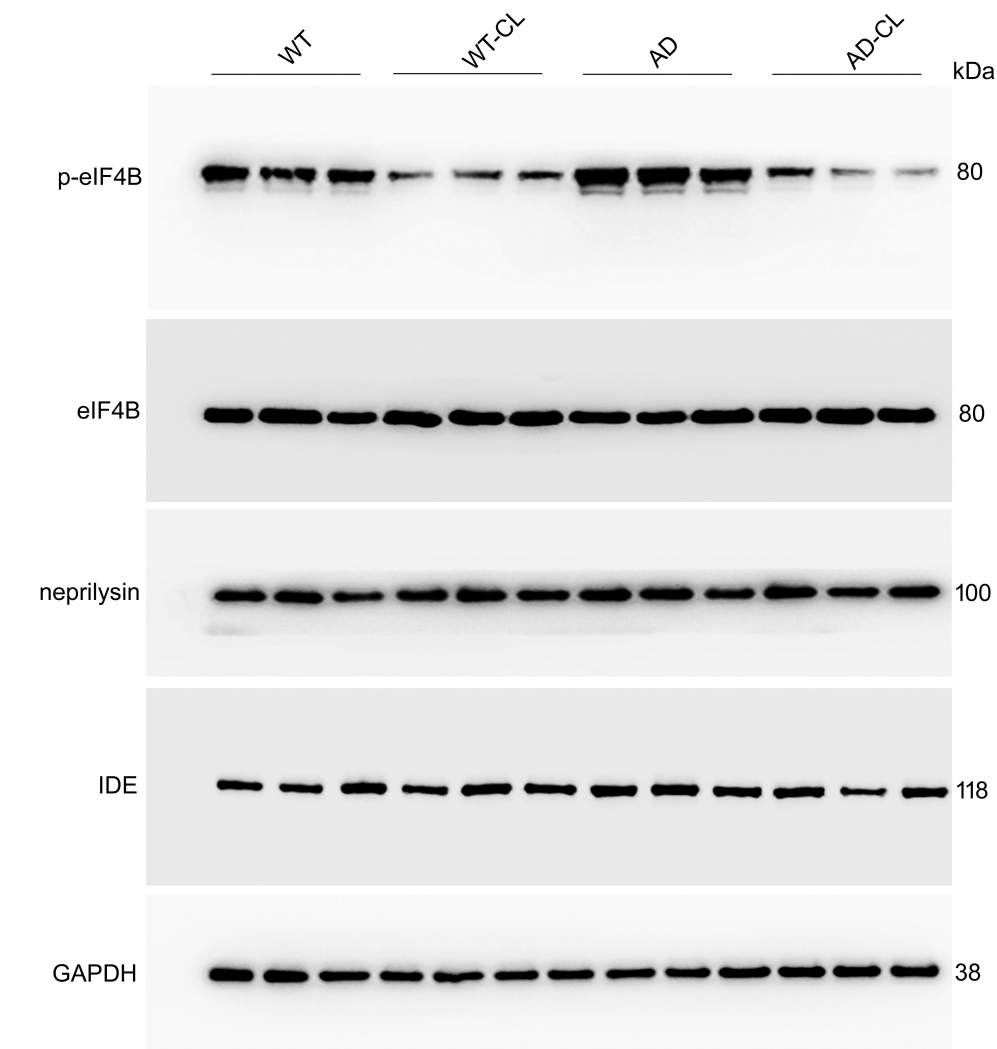

The WB images with the ladders have been placed in revised PDF file. In addition, there are a couple of technical issues we would like to address regarding the data, please refer to the following for detailed description.

Except BACE1 in Fig. 1B, which is the major focus of this study and is shown in full-membrane, the other protein bands have been pre-cut from the full PVDF membrane before probing.

We think the major work of our study deals with large amount of Western blotting (WB) experiments, which is unlike most of the papers published in Brain. One way to improve our working efficiency is to pre-cut the full PVDF membrane into different parts.

Considering the internal reference for a target protein, it might be time and effort consuming to probe a protein on a full membrane. For example, after we have probed ADAM10 on the full membrane, the subsequent probing of the internal reference GAPDH/ $\beta$ -actin would be possible only after we have stripped the same membrane. This process would result in possible compromise of the band quality and sometimes failure. Although the internal reference can be probed by another round of gel-running using the same samples, this does not guarantee the re-productivity due to the possible technique issues ranging from sampling to gel running and membrane transferring.

Alternatively, cutting the PVDF membrane would allow us to probe at least two proteins at the same time and to solve this problem quickly. Please refer to the following diagrams that show how we have cut the membrane. Since the WB methods of all proteins in our study have been previously reported, and the corresponding molecular weight (MW) can be easily identified, there would be no difficulties in cutting the membrane according to the visible markers.

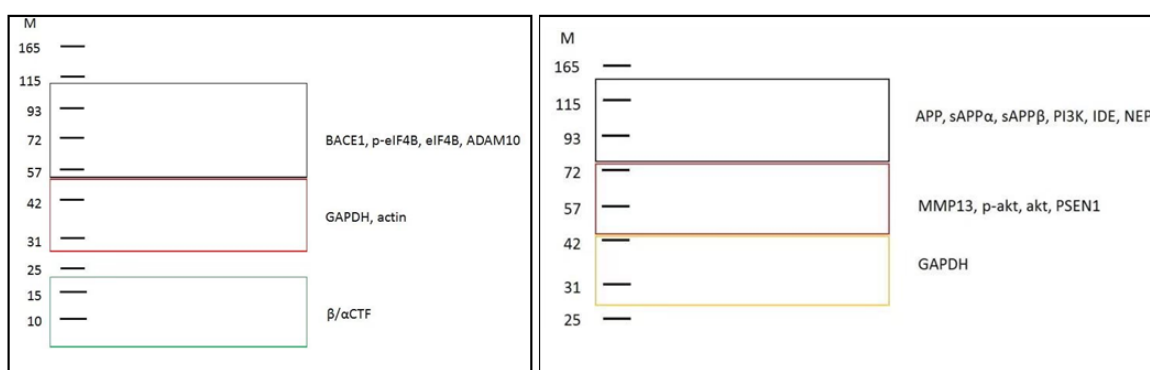

In the revised file, the ladder is indeed in position (blank lane on the left) but not visible in most cases. As we have known, it is impossible to have an image that contains the clear ladder and the protein band, unless the previously separate ladder image and protein image are merged. This involves an additional signal capturing and merging processes. To save time, we just focused on protein bands and left the ladder in the blank lane. Also, a few blots do not have the ladders attached. This has resulted from another way of cutting. Sometimes several proteins of different interest share one set of marker. In the figure shown below, protein-1 is probed for other use, while protein-2/-3/-4 is used for the current study. Since the MW of protein-2/-3/-4 is known from literature, we were sure that protein-2/-3/-4 is the target protein.

**15-well comb**

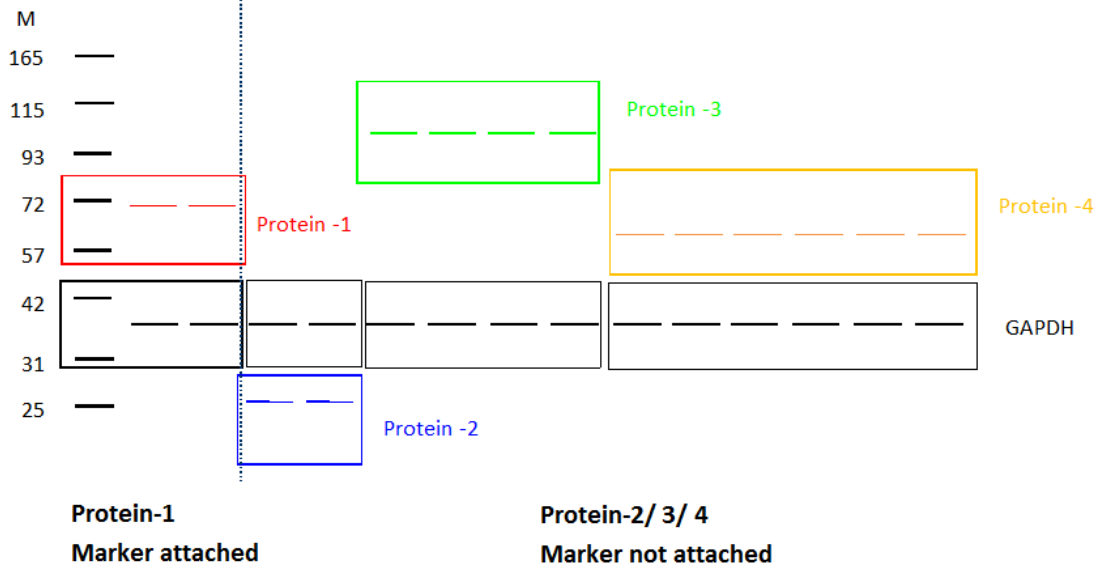

In short, we realized that (1) the WB images are not in full-membrane, and (2) most ladders are not visible but shown in blank lanes and some are not attached with protein bands. Meanwhile, we assure that these are indeed raw data. We believe that these routine WB techniques for this single paper in the past 7 years, have been widely used by peer researchers in the area.
